# Supplementary material for: Fabrication of single Pt@Au nanowire electrodes for monitoring hydrogen peroxide released from living cells
Source: Royal Society of Chemistry journal article supplement (doi:10.1039/c7ra08085a), 2017-01-01
Supplement: c7ra08085a1.pdf [file c7ra08085a1.pdf]

***Supporting Information***

**Fabrication of Single Pt@Au Nanowire Electrodes for Monitoring Hydrogen Peroxide Released from Living Cells**

Yong Liu, Yaoyao Zhang, Hongmei Hua, and Yongxin Li\*

Anhui Key Laboratory of Chemo/Biosensing, College of Chemistry and Materials Science, Anhui Normal University, Wuhu, 241000, P.R. China

\*corresponding author. Email: [yongli@mail.ahnu.edu.cn](mailto:yongli@mail.ahnu.edu.cn);

Phone: 86-553-386-9302; Fax: 86-553-386-9303

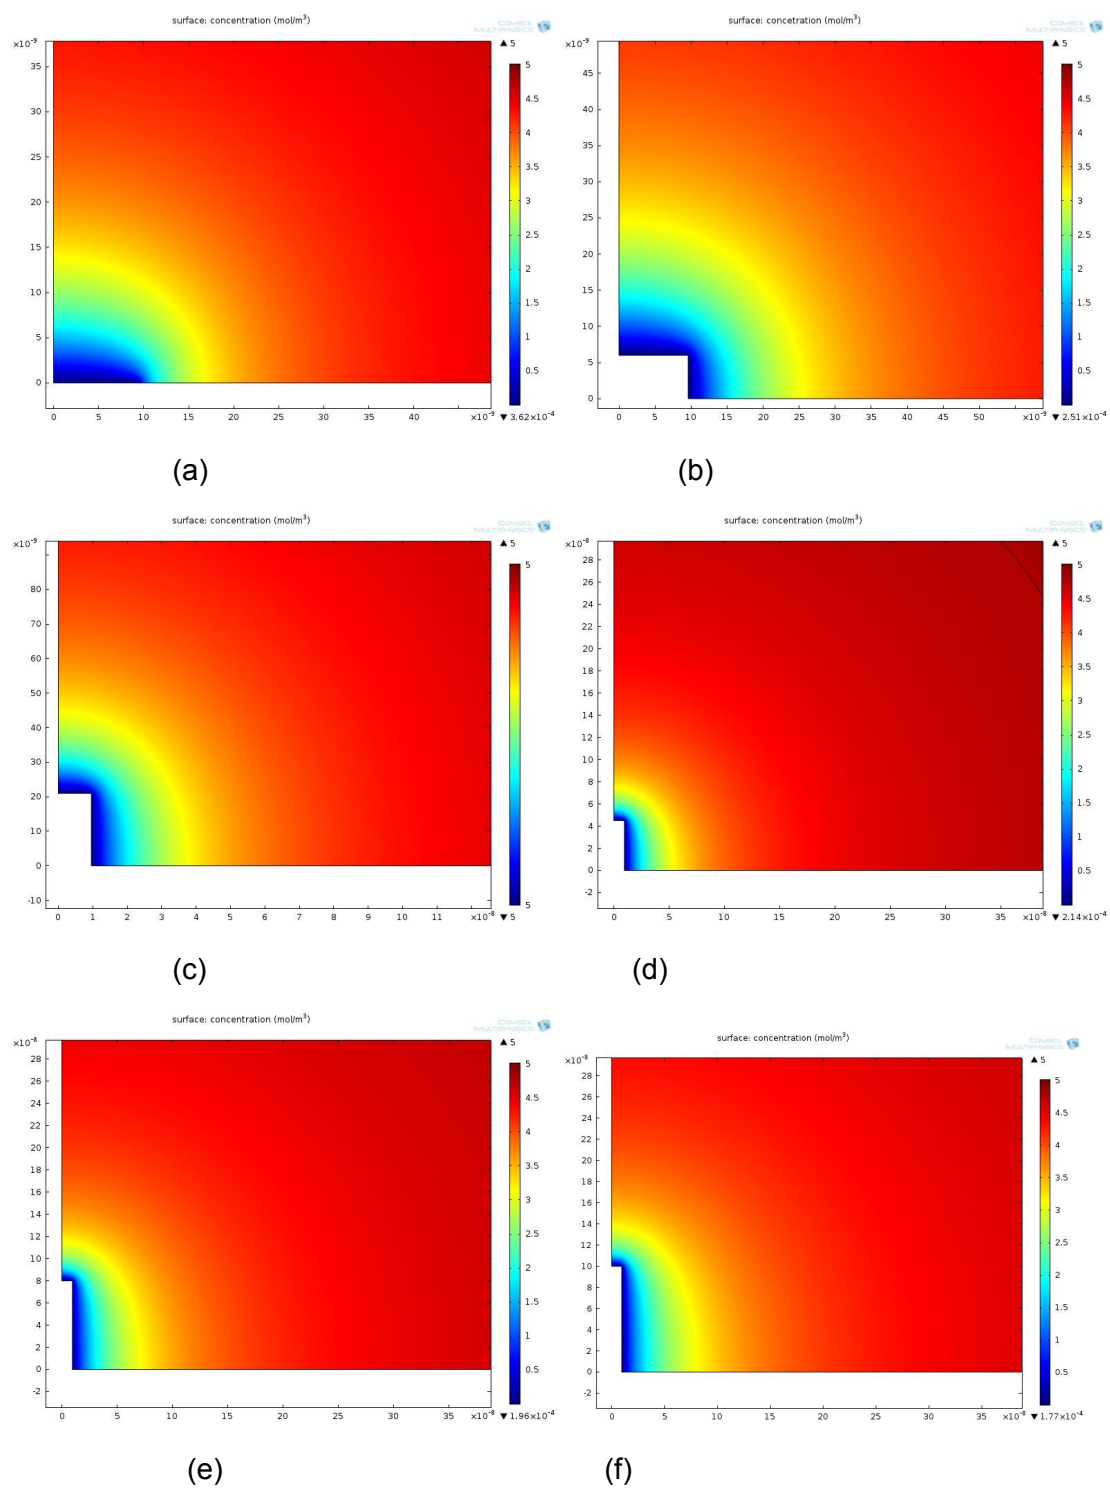

**Figure S1.** The simulation results of 5 mM Fc diffusion on the surface of Au nanowire electrodes with different wire length (a, 0 nm; b, 6 nm; c, 21 nm; d, 45 nm; e, 80 nm; f, 100 nm)

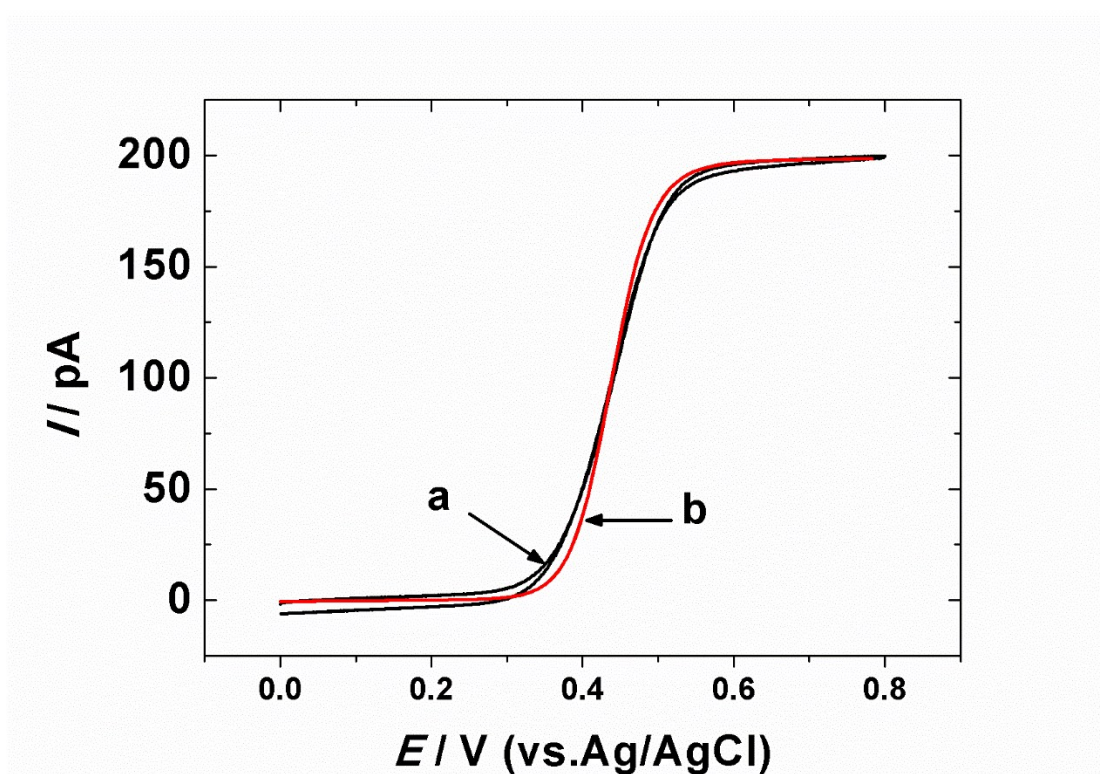

**Figure S2.** (a) Voltammetric responses of Au nanowire electrodes in a ACN solution containing 0.2 M TBAPF<sub>6</sub>. Radius: 7 nm, Length: 71 nm ; Scan rate is 20 mV/s. (b) The simulation result of Fc diffusion on the surface of Au nanowire electrode.

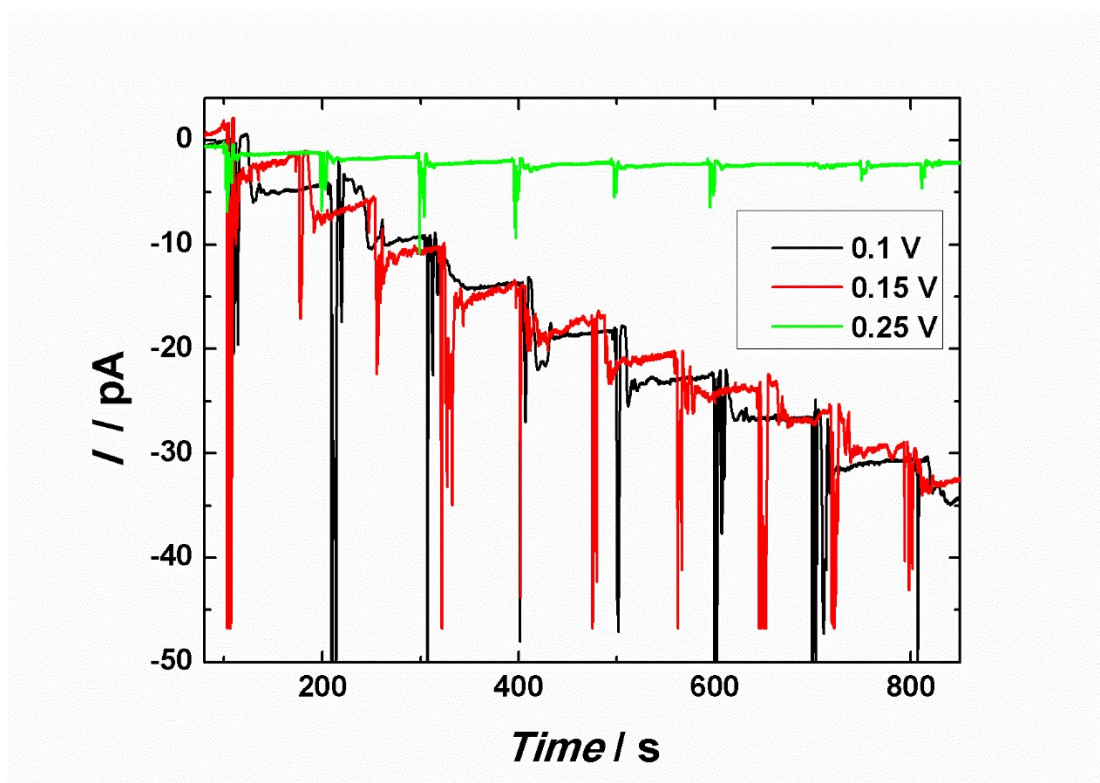

**Figure S3.** Amperometric responses of the single Pt@AuNWE to the successive additions of 4  $\mu\text{M}$   $\text{H}_2\text{O}_2$  into 10 mM the stirring PBS (pH= 7.4) at the applied potential of 0.1 V, 0.15 V, 0.25V, respectively. Radius of the nanoelectrode,  $\sim 10$  nm; Length of the nanoelectrode,  $\sim 200$  nm.

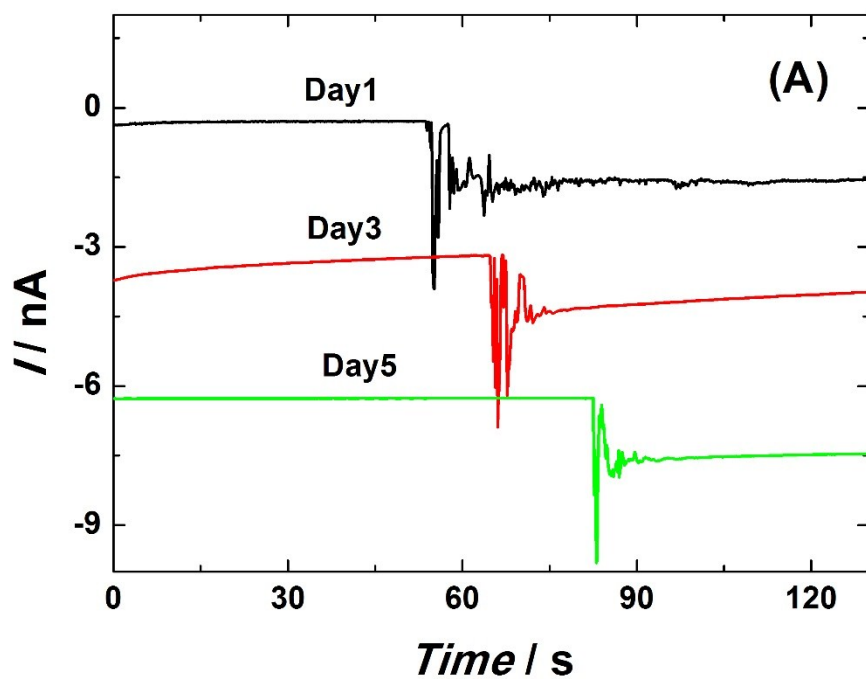

**Figure S4.** Amperometric responses of single Pt@AuNWE for the detection of 10  $\mu\text{M}$   $\text{H}_2\text{O}_2$  at day1, day3 and day5, respectively. Applied potential, 0.10 V; Radius of the nanoelectrode,  $\sim 10$  nm; Length of the nanoelectrode,  $\sim 200$  nm.

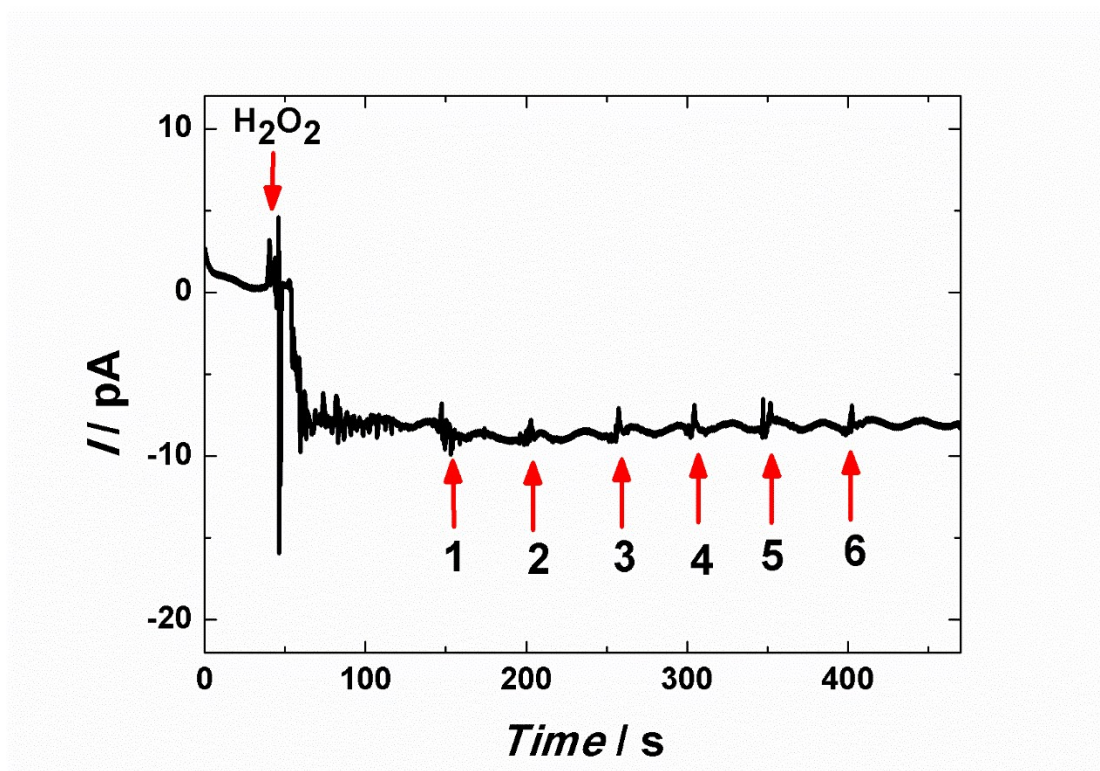

**Figure S5.** Amperometric responses of single Pt@AuNWE for the detection of 10  $\mu\text{M}$   $\text{H}_2\text{O}_2$  in the presence of 0.5 mM ascorbic acid (1), 0.1 mM dopamine (2), 1.0 mM glucose(3), 1.0 mM uric acid (4), 1.0 mM lysine (5), and 1.0 mM L-cysteine (6), respectively. Applied potential, 0.10 V; Radius of the nanoelectrode,  $\sim 10$  nm; Length of the nanoelectrode,  $\sim 200$  nm.
